# Supplementary material
Source: MDPI journal article supplement (https://www.mdpi.com/2073-4352/12/5/603)

**Figure S1.** Zeta potential analysis of the synthesized silver nanoparticles.

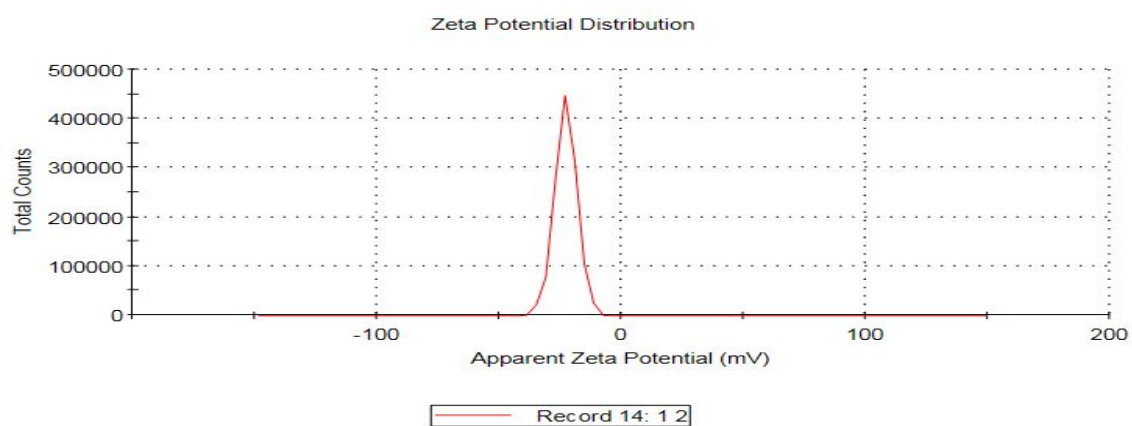

Supplement: s1 [file s1]
